# Supplementary material for: BIKO-Mathekiste
Source: Atypon-hosted journal article supplement (doi:10.1026/2191-9186/a000380), 2018-07-01
Supplement: 2191-9186_a000380_esm1.pdf [file 2191-9186_a000380_esm1.pdf]

ESM 1. Tabelle 1.

Auswahl der Spiele aus der *BIKO-Mathekiste* mit Zuordnung zu den numerischen Basisfähigkeiten (B1 bis B6) sowie der Anzahl Kinder ( $N_K$ ) und Spielepisoden ( $N_S$ ), in denen das Spiel gespielt wurde.

| Name des Spiels                                        | $N_K$ | $N_S$ | B1 | B2 | B3 | B4  | B5 | B6 |
|--------------------------------------------------------|-------|-------|----|----|----|-----|----|----|
| Eins, Vier, Viele/Einsteiger: <i>Brettspiel</i>        | 26    | 74    |    |    |    |     | x  |    |
| Flinke Flosse: <i>Karten-Bewegungsspiel</i>            | 25    | 95    |    |    |    |     | x  |    |
| Raupe Nimmersatt: <i>Puzzle</i>                        | 21    | 55    |    |    |    |     | x  |    |
| Zahlenzauber: <i>Würfel-Brettspiel</i>                 | 20    | 63    |    |    |    |     | x  |    |
| Schlaubär-Tauziehen: <i>Würfelspiel</i>                | 17    | 31    |    | x  |    |     |    |    |
| Max Mümmelmann: <i>Quartettspiel</i>                   | 15    | 47    |    |    | x  |     |    |    |
| Zahlenweg: <i>Bewegungsspiel</i>                       | 14    | 33    |    | x  |    |     |    |    |
| Schlaubär-Memory: <i>Memory</i>                        | 14    | 21    |    |    |    |     | x  |    |
| Geißlein versteck dich/einfach: <i>Gedächtnisspiel</i> | 13    | 20    |    |    |    | x   |    |    |
| Was zählt: <i>Bildkarten</i>                           | 11    | 20    |    |    |    |     | x  |    |
| Full House: <i>Spielesammlung DKZBI</i>                | 15    | 21    |    |    |    |     | x  |    |
| Halli Galli: <i>Bildkarten von (Teil)Mengen</i>        | 7     | 21    |    |    |    |     |    | x  |
| Zehn kleine Raupenkinder: <i>Bilderbuch</i>            | 7     | 21    |    |    |    | x   |    |    |
| Bewegtes Zählen: <i>Bewegungsspiel</i>                 | 7     | 20    |    |    |    |     | x  |    |
| Maus Puzzle: <i>Puzzle mit Zahlwürfel</i>              | 7     | 20    |    |    | x  |     |    |    |
| Warum immer ich: <i>Würfelspiel</i>                    | 7     | 10    |    |    | x  | (x) |    |    |
| Prinzessin Nummer/Zahlenwürfel: <i>Puzzle</i>          | 6     | 25    |    |    | x  |     |    |    |
| Fünfter sein: <i>Bilderbuch</i>                        | 6     | 12    |    | x  |    |     |    |    |
| Rechengeschichte: <i>Narration mit Handpuppe</i>       | 5     | 20    |    |    |    | x   |    |    |
| Geißlein versteck dich: <i>Gedächtnisspiel</i>         | 5     | 10    |    |    |    | x   |    |    |
| Haus der Bären: <i>Zahlenhaus mit Rechenbären</i>      | 5     | 10    |    |    | x  |     |    |    |
| Hamstern: <i>Kartenspiel</i>                           | 5     | 8     |    |    |    |     | x  |    |
| von Zahl zu Zahl: <i>Bewegungsspiel</i>                | 4     | 6     |    | x  |    |     |    |    |
| Prinzessin Nummer: <i>Puzzle</i>                       | 4     | 6     |    | x  |    |     |    |    |
| Maus Puzzle: <i>Puzzle mit Augwürfel</i>               | 4     | 5     |    | x  |    |     |    |    |
| Meine fünf Ballons: <i>Kartenspiel</i>                 | 4     | 5     |    |    |    | x   |    |    |
| Bunte Reihe: <i>Kartenspiel</i>                        | 4     | 4     |    | x  |    |     |    |    |
| Eins, Vier, Viele /advanced: <i>Brettspiel</i>         | 3     | 8     |    |    |    |     |    | x  |

| Name des Spiels                                               | N <sub>K</sub> | N <sub>S</sub> | B1  | B2 | B3 | B4 | B5 | B6 |
|---------------------------------------------------------------|----------------|----------------|-----|----|----|----|----|----|
| Zahlenzwerge: <i>Ereigniskarten</i>                           | 3              | 5              |     |    |    |    | x  |    |
| 10 gelbe Entchen: <i>Bilderbuch</i>                           | 3              | 4              |     |    | x  |    |    |    |
| Nikitin Musterlegen <i>Musterwürfel</i>                       | 3              | 3              | x   |    |    |    |    |    |
| Rot gegen Blau: <i>Das Kleine Zahlenbuch</i>                  | 3              | 3              |     |    |    |    | x  |    |
| Zähl doch mal: <i>Wimmelbilder aus DKZ1</i>                   | 3              | 3              | x   | x  |    |    |    |    |
| Boot nach Schangrila: <i>Bilderbuch</i>                       | 3              | 3              |     |    |    | x  |    |    |
| Wir entdecken die Zahlen: <i>Sachbuch</i>                     | 2              | 3              |     |    | x  |    |    |    |
| Zehn kleine Bären: <i>Bilderbuch</i>                          | 2              | 3              |     |    |    | x  |    |    |
| Dschungeltrio: <i>Rechnen mit Plättchen</i>                   | 2              | 2              |     |    |    |    |    | x  |
| Shut the box: <i>Gesellschaftsspiel</i>                       | 2              | 2              |     |    |    |    |    | x  |
| Kinderwagen rücken: <i>Gleiches Material in großen Mengen</i> | 2              | 2              | (x) | x  |    |    |    |    |
| Maus auf Klavier: <i>Bewegungsspiel</i>                       | 2              | 2              |     | x  |    |    |    |    |
| Rechenkapitän-tolle Flotte: <i>Brettspiel</i>                 | 2              | 1              |     |    |    |    |    | x  |
| Rechenkapitän-Einführung: <i>Brettspiel</i>                   | 1              | 1              |     |    |    |    | x  |    |

Anmerkungen. B1: Kategorien bilden und Muster begreifen. B2: Zahlwörter und Zahlwortreihe erwerben. B3: Ziffern und Zahlsymbole lesen lernen. B4: Mengenbeziehungen pränumerisch begreifen. B5: Objekte zählen und Anzahlen begreifen. B6: Mengenrelationen numerisch präzisieren.

Supplement zu: Seeger, D., Roth, M. & Holodynski, M. (2018). BIKO-Mathekiste. Spielbasierte Förderung für 4- bis 6-jährige Kinder mit einem Entwicklungsrisiko im Bereich numerischer Basiskompetenz. *Frühe Bildung*, 7(3).
