# Supplementary material for: BIKO-Mathekiste
Source: Atypon-hosted journal article supplement (doi:10.1026/2191-9186/a000380), 2018-07-01
Supplement: 2191-9186_a000380_esm2.pdf [file 2191-9186_a000380_esm2.pdf]

## Mengen und Zahlen

- Kategorien und Muster bilden
- Zahlwörter und Zahlwortreihe erwerben
- Ziffern und Zahlsymbole lesen lernen
- Mengenbeziehungen pränumerisch begreifen
- Objekte zählen und Anzahlen begreifen
- Mengenbeziehungen numerisch präzisieren

## Flinke Flosse

- Erzieherin mit
- Kind (einzeln)
- Kleingruppe
- Gesamtgruppe
- Spielniveau: Regelspiel

## Schnittstellen zu anderen Förderbereichen

- Bewegungen an Regeln ausrichten
- Spracherwerb
- Regeln verstehen – Emotionen regulieren

### Spielaktivität:

Ein Kind wirft die sechs Würfel, die Fisch- und Wellensymbole zeigen. Dann versucht jeder Mitspieler, die Anzahl der Fische auf den Würfeln so schnell wie möglich zu erfassen/zählen und dann mit der Hand auf das Kärtchen mit der gleichen Anzahl an Fischen zu klatschen. Hat das Kind ein „richtiges“ Kärtchen erwischt, d.h. die Anzahl der Fische auf der Karte stimmt mit der Anzahl an Fischen auf den Würfeln überein, darf es diese Karte umdrehen. Zeigt die Kartenrückseite ein Loch, geht das Kind diesmal leer aus, weil die Fische entkommen sind. Zeigt die Kartenrückseite ein heiles Netz, darf das Kind einen Glitzerfisch aus der Mitte nehmen. Das Spiel endet, wenn kein Glitzerfisch mehr in der Mitte liegt.

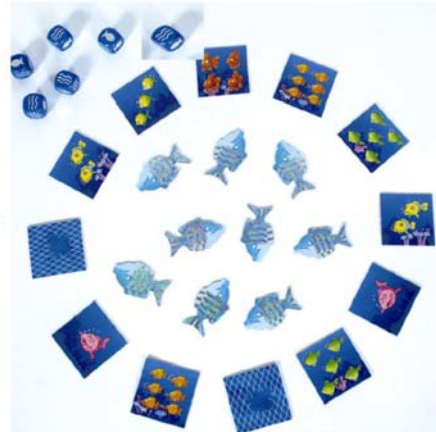

## Materialliste

Ravensburger Verlag

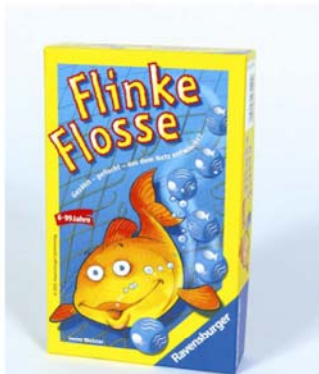

## Hinweise für die pädagogische Fachkraft

Dieses Spielmaterial bietet Kindern die Gelegenheit, kleine Mengen simultan zu erfassen die Zahlwortreihe zu nutzen, Objekte (Fische) zu zählen

Mit den Älteren können Sie zusätzlich Fragen behandeln, wie  
Wer hat mehr Fische?  
Wer hat weniger?  
Wer hat die meisten?

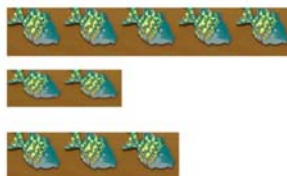

## Spielvarianten

Für die Jüngeren:  
Das Tempo der Mitspieler und die Regeln dieses Spiels stellen an jüngeren Kinder hohe Anforderungen auch bezüglich ihrer Emotionsregulation. Spielen Sie daher mit den Jüngeren zunächst allein, um das Tempo an ihre Kompetenz der Anzahlerfassung anpassen zu können und die Erfolgsbilanz des Kindes möglichst positiv zu halten.

Für die Älteren:  
„Wenn ihr wissen wollt, wer die meisten Glitzerfische hat, muss jedes Kind seine Fische in eine Reihe legen. Wer hat die längste Reihe....? Der hat auch die meisten Fische!“

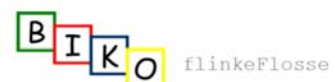

ESM 2. Abbildung 1

Vorder- und Rückseite der Spielbeschreibung eines Spiels auf einer Spielkarte der *BIKO-Mathekiste* (aus Seeger & Holodynski, 2013).

Supplement zu: Seeger, D., Roth, M. & Holodynski, M. (2018). BIKO-Mathekiste. Spielbasierte Förderung für 4- bis 6-jährige Kinder mit einem Entwicklungsrisiko im Bereich numerischer Basiskompetenz. *Frühe Bildung*, 7(3).
